# Supplementary material for: User Models for Personalized Physical Activity Interventions: Scoping Review
Source: PubMed Central journal article supplement (PMC6352015; doi:10.2196/11098), 2019-01-16
Supplement: mhealth_v7i1e11098_app1.pdf [file mhealth_v7i1e11098_app1.pdf]

This is a Multimedia Appendix to a full manuscript published in the J Med Internet Res. For full copyright and citation information see <http://dx.doi.org/10.2196/11098>.

Table: Overview of studies

| Serial number | Paper reference        | Objective                             | Intervention presentation | Intervention generation | Intervention generation technique             | Theoretical model                     | Personalization                                                           | User model                                                                                     |
|---------------|------------------------|---------------------------------------|---------------------------|-------------------------|-----------------------------------------------|---------------------------------------|---------------------------------------------------------------------------|------------------------------------------------------------------------------------------------|
| 1             | Vandelanotte et al [1] | Healthy lifestyle                     | Website                   | Automatic               | Knowledge-based                               | TPB <sup>a</sup> and TTM <sup>b</sup> | Goal and activity recommendation and educational and motivational content | PA <sup>c</sup> profile, demographics, BCT <sup>d</sup> parameters, and contextual information |
| 2             | Ahire et al [2]        | Healthy lifestyle : diet and exercise | Website                   | Automatic               | Knowledge-based and data-driven–decision tree | —                                     | Activity recommendation                                                   | PA profile, demographics, medical data, and contextual information                             |
| 3             | Mukhtar [3]            | Healthy lifestyle:                    | Mobile app                | Automatic               | Knowledge-based                               | Fogg’s Behav                          | Activity recommendation                                                   | PA profile,                                                                                    |

|   |                  |                                                                   |                        |               |                 |                                                           |                                      |                                                        |
|---|------------------|-------------------------------------------------------------------|------------------------|---------------|-----------------|-----------------------------------------------------------|--------------------------------------|--------------------------------------------------------|
|   |                  | exercise and diet                                                 | widget                 |               |                 | ior Model and various clinical guidelines for health care | ndation and intervention timing      | demographics, medical data, and contextual information |
| 4 | Tseng et al [4]  | Healthy lifestyle : exercise and diet                             | Website and mobile app | Semiautomated | Knowledge-based | —                                                         | Goal and activity recommendation     | PA profile and medical data                            |
| 5 | Storm et al [5]  | Healthy lifestyle : exercise and fruits and vegetable consumption | Website                | Automatic     | Knowledge-based | HAPA <sup>e</sup>                                         | Educational and motivational content | PA profile, demographics, and BCT parameters           |
| 6 | Schulz et al [6] | Healthy lifestyle : PA, diet, alcohol, and smoking                | Website                | Automatic     | Knowledge-based | I-Change Model                                            | Motivational content                 | PA profile, demographics, medical data,                |

|   |                   |                                                  |                                  |           |                                          |                                            |                                                                             |                                                                      |
|---|-------------------|--------------------------------------------------|----------------------------------|-----------|------------------------------------------|--------------------------------------------|-----------------------------------------------------------------------------|----------------------------------------------------------------------|
|   |                   |                                                  |                                  |           |                                          |                                            |                                                                             | and contextual information                                           |
| 7 | Hermens et al [7] | Healthy lifestyle : personalized coaching system | Mobile app                       | Automatic | Combined knowledge-based and data-driven | Stage of change model                      | Goal and activity recommendation, motivational content, intervention timing | PA profile, demographics, BCT parameters, and contextual information |
| 8 | Lee et al [8]     | Healthy lifestyle : exercise and diet            | Website                          | Automatic | Knowledge-based                          | American Cancer Society guidelines and TTM | Goal and activity recommendation and motivational and educational content   | PA profile, demographics, BCT parameters, and contextual information |
| 9 | Fahim et al [9]   | Increase PA                                      | Any device from API <sup>f</sup> | Automatic | Combined knowledge-based and data-driven | Centers for Disease Control                | Activity recommendation                                                     | PA profile, demographics, and                                        |

|    |                              |                |               |               |                                                                 |                                                                                              |                                                                                               |                                                                                 |
|----|------------------------------|----------------|---------------|---------------|-----------------------------------------------------------------|----------------------------------------------------------------------------------------------|-----------------------------------------------------------------------------------------------|---------------------------------------------------------------------------------|
|    |                              |                |               |               |                                                                 | l and<br>Preven<br>tion<br>guideli<br>nes                                                    |                                                                                               | context<br>ual<br>informa<br>tion                                               |
| 10 | Dharia<br>et al<br>[10]      | Increase<br>PA | Mobile<br>app | Automa<br>tic | Data-<br>driven:collab<br>orative<br>filtering                  | —                                                                                            | Activity<br>and<br>fitness<br>partner<br>recomme<br>ndation<br>and<br>interventi<br>on timing | PA<br>profile,<br>demogr<br>aphics,<br>and<br>context<br>ual<br>informa<br>tion |
| 11 | Rabbi<br>et al<br>[11]       | Increase<br>PA | Mobile<br>app | Automa<br>tic | Data-<br>driven:multi<br>armed bandit<br>and pareto<br>frontier | Princi<br>ple of<br>SCT <sup>g</sup><br>and<br>Fogg's<br>Behav<br>ior<br>Model<br>and<br>TTM | Goal and<br>activity<br>recomme<br>ndation                                                    | PA<br>profile,<br>demogr<br>aphics,<br>and<br>context<br>ual<br>informa<br>tion |
| 12 | Twardo<br>wski et<br>al [12] | Increase<br>PA | <sup>h</sup>  | Automa<br>tic | Data-<br>driven:reco<br>mmendation<br>system                    | —                                                                                            | Goal and<br>activity<br>recomme<br>ndation                                                    | PA<br>profile,<br>demogr<br>aphics,<br>medical<br>data,<br>and<br>context       |

|    |                           |                |                  |               |                                           |                   |                                                                  |                                                                       |
|----|---------------------------|----------------|------------------|---------------|-------------------------------------------|-------------------|------------------------------------------------------------------|-----------------------------------------------------------------------|
|    |                           |                |                  |               |                                           |                   |                                                                  | ual<br>informa<br>tion                                                |
| 13 | Yom-<br>Tov et<br>al [13] | Increase<br>PA | SMS <sup>i</sup> | Automa<br>tic | Data-driven<br>reinforceme<br>nt learning | —                 | Motivati<br>onal<br>content                                      | PA<br>profile<br>and<br>demogr<br>aphics                              |
| 14 | Lim et<br>al [14]         | Increase<br>PA | Mobile<br>app    | Automa<br>tic | Data-driven-<br>RNN <sup>j</sup>          | —                 | Activity<br>recomme<br>ndation<br>and<br>interventi<br>on timing | PA<br>profile<br>and<br>context<br>ual<br>informa<br>tion             |
| 15 | Cook et<br>al [15]        | Increase<br>PA | Websit<br>e      | Automa<br>tic | Knowledge-<br>based                       | TPB<br>and<br>SCT | Educatio<br>nal and<br>motivatio<br>nal<br>content               | PA<br>profile,<br>demogr<br>aphics,<br>and<br>BCT<br>paramet<br>ers   |
| 16 | Larsen<br>et al<br>[16]   | Increase<br>PA | Websit<br>e      | Automa<br>tic | Knowledge-<br>based                       | SCT<br>and<br>TTM | Educatio<br>nal<br>content                                       | PA<br>profile,<br>demogr<br>aphics,<br>medical<br>data,<br>and<br>BCT |

|    |                     |             |                |           |                 |                                         |                                      |                                                                                    |
|----|---------------------|-------------|----------------|-----------|-----------------|-----------------------------------------|--------------------------------------|------------------------------------------------------------------------------------|
|    |                     |             |                |           |                 |                                         |                                      | parameters                                                                         |
| 17 | Short et al [17]    | Increase PA | Print, website | Automatic | Knowledge-based | SCT                                     | Educational and motivational content | PA profile, demographics, medical data, BCT parameters, and contextual information |
| 18 | Boudreau et al [18] | Increase PA | Website        | Automatic | Knowledge-based | I-Change model                          | Educational and motivational content | PA profile, demographics, and BCT parameters                                       |
| 19 | Moreau et al [19]   | Increase PA | Website        | Automatic | Knowledge-based | SCT, TPB, and PA guidelines by Canadian | Educational and motivational content | PA profile, demographics, and BCT parameters                                       |

|    |                       |             |                      |           |                 |                                                |                                                          |                                                      |
|----|-----------------------|-------------|----------------------|-----------|-----------------|------------------------------------------------|----------------------------------------------------------|------------------------------------------------------|
|    |                       |             |                      |           |                 | Diabetes Association                           |                                                          |                                                      |
| 20 | Rajanna et al [20]    | Increase PA | Mobile app           | Automatic | Knowledge-based | Fogg's Behavior Model                          | Goal and activity recommendation and intervention timing | PA profile, demographics, and contextual information |
| 21 | Irvine et al [21]     | Increase PA | Website and printout | Automatic | Knowledge-based | Stage of Change Model                          | Activity recommendation and educational content          | PA profile and BCT parameters                        |
| 22 | Friedrichs et al [22] | Increase PA | Website              | Automatic | Knowledge-based | SDT <sup>k</sup> and motivational interviewing | Educational and motivational content                     | PA profile, demographics, and BCT parameters         |
| 23 | Blake et al [23]      | Increase PA | SMS and email        | Automatic | Knowledge-based | TPB                                            | Motivational content                                     | PA profile and BCT                                   |

|    |                              |                |                                                                                                                      |               |                     |                                                                                                                                                              |                                                                  |                                                                                         |
|----|------------------------------|----------------|----------------------------------------------------------------------------------------------------------------------|---------------|---------------------|--------------------------------------------------------------------------------------------------------------------------------------------------------------|------------------------------------------------------------------|-----------------------------------------------------------------------------------------|
|    |                              |                |                                                                                                                      |               |                     |                                                                                                                                                              |                                                                  | paramet<br>ers                                                                          |
| 24 | Coolba<br>ugh et<br>al [24]  | Increase<br>PA | Visual<br>feedba<br>ck<br>from<br>activit<br>y<br>monito<br>r based<br>on<br>prescri<br>bed PA<br>and<br>websit<br>e | Automa<br>tic | Knowledge-<br>based | Ameri<br>can<br>Colleg<br>e of<br>Sports<br>Medic<br>ine<br>trainin<br>g<br>progre<br>ssion<br>guideli<br>nes for<br>sedent<br>ary<br>low-<br>risk<br>adults | Goal<br>recomme<br>ndation                                       | PA<br>profile                                                                           |
| 25 | Hargre<br>aves et<br>al [25] | Increase<br>PA | Websit<br>e and<br>messag<br>e                                                                                       | Automa<br>tic | Knowledge-<br>based | PA<br>guideli<br>ne                                                                                                                                          | Goal<br>recomme<br>ndation<br>and<br>motivatio<br>nal<br>content | PA<br>profile,<br>demogr<br>aphics,<br>medical<br>data,<br>and<br>BCT<br>paramet<br>ers |



|    |                      |             |                        |           |                 |                             |                                      |                                                                                    |
|----|----------------------|-------------|------------------------|-----------|-----------------|-----------------------------|--------------------------------------|------------------------------------------------------------------------------------|
| 26 | Williams et al [26]  | Increase PA | Website and email      | Automatic | Knowledge-based | Several clinical guidelines | Goal and activity recommendation     | PA profile and medical data                                                        |
| 27 | Kwasnicka et al [27] | Increase PA | Website and SMS        | Automatic | Knowledge-based | BCT used                    | Educational and motivational content | PA profile, demographics, BCT parameters, and contextual information               |
| 28 | Janols et al [28]    | Increase PA | Website and mobile app | Automatic | Knowledge-based | Activity Theory and SDT     | Motivational content                 | PA profile, demographics, medical data, BCT parameters, and contextual information |

|    |                   |             |                           |           |                 |                                                      |                                                                  |                                                                      |
|----|-------------------|-------------|---------------------------|-----------|-----------------|------------------------------------------------------|------------------------------------------------------------------|----------------------------------------------------------------------|
| 29 | Ali et al [29]    | Increase PA | Mobile app                | Automatic | Knowledge-based | Center for Disease Control and Prevention guidelines | Goal and Activity recommendation and educational content         | PA profile, demographics, and contextual information                 |
| 30 | Mistry et al [30] | Increase PA | SMS and email             | Automatic | Knowledge-based | TPB                                                  | Motivational content and intervention timing                     | PA profile, demographics, BCT parameters, and contextual information |
| 31 | Peels et al [31]  | Increase PA | Website, email, and print | Automatic | Knowledge-based | I-Change Model, TTM, HAPA, Self-regulation Theor     | Activity recommendation and educational and motivational content | PA profile, demographics, BCT parameters, and contextual information |

|    |                   |             |                        |           |                        |             |                                                                           |                                                                      |
|----|-------------------|-------------|------------------------|-----------|------------------------|-------------|---------------------------------------------------------------------------|----------------------------------------------------------------------|
|    |                   |             |                        |           |                        | y           |                                                                           |                                                                      |
| 32 | Klein et al [32]  | Increase PA | Mobile app and website | Automatic | Knowledge-based system | SCT and TTM | Goal and activity recommendation and educational and motivational content | PA profile, demographics, BCT parameters, and contextual information |
| 33 | Ammann et al [33] | Increase PA | Website                | Automatic | Knowledge-based        | TPB and TTM | Educational and motivational content                                      | PA profile, demographics, and BCT parameters                         |
| 34 | Pyky et al [34]   | Increase PA | Website                | Automatic | Knowledge-based        | TTM         | Motivational content                                                      | PA profile, demographics, BCT parameters, and contextual             |

|    |                                   |                |                                  |                   |                                                          |                                                                   |                                                                                            |                                                                                                        |
|----|-----------------------------------|----------------|----------------------------------|-------------------|----------------------------------------------------------|-------------------------------------------------------------------|--------------------------------------------------------------------------------------------|--------------------------------------------------------------------------------------------------------|
|    |                                   |                |                                  |                   |                                                          |                                                                   |                                                                                            | informa<br>tion                                                                                        |
| 35 | Varadh<br>arajan<br>et al<br>[35] | Increase<br>PA | Mobile<br>app                    | Automa<br>tic     | <sup>h</sup>                                             | In<br>associ<br>ation<br>with<br>behavi<br>oral<br>scienti<br>sts | Goal and<br>fitness<br>partner<br>recommen<br>dation<br>and<br>motivatio<br>nal<br>content | PA<br>profile,<br>demogr<br>aphics,<br>BCT<br>paramet<br>ers, and<br>context<br>ual<br>informa<br>tion |
| 36 | Codrea<br>nu et al<br>[36]        | Increase<br>PA | Kinect                           | Semiaut<br>omated | Knowledge-<br>based system                               | —                                                                 | Goal and<br>activity<br>recommen<br>dation                                                 | PA<br>profile,<br>demogr<br>aphics,<br>medical<br>data,<br>and<br>context<br>ual<br>informa<br>tion    |
| 37 | Marsau<br>x et al<br>[37]         | Increase<br>PA | Websit<br>e and<br>PDF<br>report | Semiaut<br>omated | Machine<br>learning :<br>decision<br>trees and<br>expert | Protec<br>tion<br>Motiv<br>ation<br>Theor<br>y                    | Activity<br>recommen<br>dation<br>and<br>educatio<br>nal                                   | PA<br>profile,<br>demogr<br>aphics,<br>and<br>medical                                                  |

|    |                          |                                          |                          |               |                        |                                      |                                                              |                                                                      |
|----|--------------------------|------------------------------------------|--------------------------|---------------|------------------------|--------------------------------------|--------------------------------------------------------------|----------------------------------------------------------------------|
|    |                          |                                          |                          |               |                        |                                      | content                                                      | data                                                                 |
| 38 | Alley et al [38]         | Increase PA                              | Website                  | Semiautomatic | Knowledge-based        | TPB and Elaboration Likelihood Model | Goal recommendation and motivational and educational content | PA profile, demographics, BCT parameters, and contextual information |
| 39 | Mitchell et al [39]      | Increase PA                              | Website, telephone calls | Semiautomatic | Knowledge-based        | SCT and SDT                          | Goal recommendation                                          | PA profile, medical data, and BCT parameters                         |
| 40 | Oostrom-Caloe et al [40] | Increase PA+medical adherence            | <sup>h</sup>             | Automatic     | Knowledge-based system | Principles of TPB and SCT            | Educational and motivational content                         | BCT parameters                                                       |
| 41 | De Cocker et al [41]     | Reduce workplace sitting time : increase | Website                  | Automatic     | Knowledge-based        | SDT, TPB, and self-regulation        | Activity recommendation and educational                      | PA profile, demographics, and                                        |

|    |                            |                |                             |               |                                                            |                                                          |                                                                       |                                              |
|----|----------------------------|----------------|-----------------------------|---------------|------------------------------------------------------------|----------------------------------------------------------|-----------------------------------------------------------------------|----------------------------------------------|
|    |                            | PA             |                             |               |                                                            | ion theory                                               | nal and motivational content                                          | BCT parameters                               |
| 42 | Triantafyllidis et al [42] | Rehabilitation | Kinect                      | Automatic     | Knowledge-based                                            | Behavioral change wheel and multiple clinical guidelines | Goal and activity recommendation and motivational content if required | PA profile and medical data                  |
| 43 | Dobrican et al [43]        | Rehabilitation | Smart watch+ smartphone app | Semiautomated | Knowledge-based system and doctor recommended target range | —                                                        | Goal recommendation                                                   | PA profile, demographics, and medical data   |
| 44 | Hales et al [44]           | Weight loss    | Mobile app                  | Automatic     | Data-driven recommendation system                          | SCT                                                      | Fitness partner recommendation who provides motivational message      | PA profile, demographics, and BCT parameters |

|    |                      |                                                    |                   |               |                                   |                                                |                                                                                 |                                                      |
|----|----------------------|----------------------------------------------------|-------------------|---------------|-----------------------------------|------------------------------------------------|---------------------------------------------------------------------------------|------------------------------------------------------|
| 45 | Martin et al [45]    | Weight loss                                        | Mobile app        | Semiautomated | Manual and knowledge-based system | Principle of TPB and Theory of reasoned action | Goal recommendation and educational content                                     | PA profile, demographics, and contextual information |
| 46 | Spark et al [46]     | Weight loss, healthy lifestyle : diet and exercise | SMS               | Semiautomated | Knowledge-based                   | SCT                                            | Goal and activity recommendation, motivational content, and intervention timing | PA profile, demographics, and contextual information |
| 47 | Kattelman et al [47] | Weight management                                  | Website and email | Automatic     | Knowledge-based                   | Stage of Change model                          | Motivational content                                                            | PA profile and BCT parameters                        |
| 48 | Partridge et al [48] | Weight management                                  | SMS and call      | Semiautomated | Knowledge-based                   | Process of change and SCT                      | Motivational content                                                            | Demographics and BCT parameters                      |

|    |                              |                                                        |             |               |                     |                                                       |                            |                                                                     |
|----|------------------------------|--------------------------------------------------------|-------------|---------------|---------------------|-------------------------------------------------------|----------------------------|---------------------------------------------------------------------|
| 49 | Waltho<br>uwer et<br>al [49] | Weight<br>manage<br>ment<br>:obesity<br>preventi<br>on | Websit<br>e | Automa<br>tic | Knowledge-<br>based | TPB,<br>SCT,<br>TTM,<br>and I-<br>Chang<br>e<br>Model | Educatio<br>nal<br>content | PA<br>profile,<br>demogr<br>aphics,<br>and<br>BCT<br>paramet<br>ers |
|----|------------------------------|--------------------------------------------------------|-------------|---------------|---------------------|-------------------------------------------------------|----------------------------|---------------------------------------------------------------------|

<sup>a</sup>TPB: Theory of Planned Behavior.

<sup>b</sup>TTM: Transtheoretical Model.

<sup>c</sup>PA: physical activity.

<sup>d</sup>BCT: behavior change technique.

<sup>e</sup>HAPA: health action process approach.

<sup>f</sup>API: Application programming interface

<sup>g</sup>SCT: Social Cognitive Theory.

<sup>h</sup>: Unclear.

<sup>i</sup>SMS: short messaging service.

<sup>j</sup>RNN: recurrent neural networks.

<sup>k</sup>SDT: self-determination theory.

## References:

1. Vandelanotte C, Short C, Plotnikoff RC, Hooker C, Canoy D, Rebar A, et al. TaylorActive - Examining the effectiveness of web-based personally-tailored videos to increase physical activity: a randomised controlled trial protocol. BMC Public Health. BMC Public Health; 2015;15(1):1–14. PMID: 26438225.
2. Ahire SB, Khanuja HK. A Personalized Framework for Health Care Recommendation. 2015 Int Conf Comput Commun Control Autom. IEEE; 2015. p. 442–445. DOI: 10.1109/ICCUBEA.2015.92.
3. Mukhtar H. Using Persuasive Recommendations in Wellness Applications based upon User Activities. Int J Adv Comput Sci Appl. 2016;7(8):349–356. DOI: 10.14569/IJACSA.2016.070847.
4. Tseng JCC, Lin B-HH, Lin Y-FF, Tseng VS, Day M-LL, Wang S-CC, et al. An interactive healthcare system with personalized diet and exercise guideline recommendation. TAAI



- 2015 - 2015 Conf Technol Appl Artif Intell. IEEE; 2016;525–532. DOI: 10.1109/TAAI.2015.7407106.
5. Storm V, Dörenkämper J, Reinwand DA, Wienert J, De Vries H, Lippke S. Effectiveness of a Web-Based Computer-Tailored Multiple-Lifestyle Intervention for People Interested in Reducing their Cardiovascular Risk: A Randomized Controlled Trial. *J Med Internet Res.* 2016;18(4):e78. PMID: 27068880.
  6. Schulz DN, Kremers SPJJ, Vandelanotte C, van Adrichem MJG, Schneider F, Candel MJJM, et al. Effects of a web-based tailored multiple-lifestyle intervention for adults: a two-year randomized controlled trial comparing sequential and simultaneous delivery modes. *J Med Internet Res. Canada;* 2014;16(1):e26. PMID: 24472854.
  7. Hermens H, op den Akker H, Tabak M, Wijsman J, Vollenbroek M. Personalized Coaching Systems to support healthy behavior in people with chronic conditions. *J Electromyogr Kinesiol. Elsevier Ltd;* 2014;24(6):815–26. PMID: 25455254.
  8. Lee MK, Park H-AA, Yun YH, Chang YJ. Development and formative evaluation of a web-based self-management exercise and diet intervention program with tailored motivation and action planning for cancer survivors. *JMIR Res Protoc. Canada;* 2013;2(1):e11. PMID: 23612029.
  9. Fahim M, Idris M, Ali R, Nugent C, Kang B, Huh E-NN, et al. ATHENA: A personalized platform to promote an active lifestyle and wellbeing based on physical, mental and social health primitives. *Sensors (Switzerland).* 2014;14(5):9313–9329. PMID: 24859031.
  10. Dharia S, Jain V, Patel J, Vora J, Yamauchi R, Eirinaki M, et al. PRO-Fit: Exercise with friends. *Proc 2016 IEEE/ACM Int Conf Adv Soc Networks Anal Mining, ASONAM 2016. IEEE;* 2016;1430–1433. DOI: 10.1109/ASONAM.2016.7752437.
  11. Rabbi M, Aung MH, Zhang M, Choudhury T. MyBehavior: automatic personalized health feedback from user behaviors and preferences using smartphones. *UbiComp '15, Sept 7–11, 2015, Osaka, Japan.* 2015;707–718. PMID: 25977197.
  12. Twardowski B, Ryzko D. IoT and Context-Aware Mobile Recommendations Using Multi-agent Systems. *2015 IEEE/WIC/ACM Int Conf Web Intell Intell Agent Technol. IEEE;* 2015. p. 33–40. DOI: 10.1109/WI-IAT.2015.120.
  13. Yom-Tov E, Feraru G, Kozdoba M, Mannor S, Tennenholtz M, Hochberg I. Encouraging physical activity in patients with diabetes: Intervention using a reinforcement learning system. *J Med Internet Res.* 2017;19(10):e338. PMID: 29017988.
  14. Lim C-G, Kim ZM, Choi H-J. Developing a Mobile Wellness Management System for Healthy Lifestyle by Analyzing Daily Living Activities. *Stud Health Technol Inform. Netherlands;* 2017;245:146–150. PMID: 29295070.
  15. Cook TL, De Bourdeaudhuij I, Maes L, Haerens L, Grammatikaki E, Widhalm K, et al. Moderators of the effectiveness of a web-based tailored intervention promoting physical activity in adolescents: the HELENA Activ-O-Meter. *J Sch Health.* 2014;84(4):256–66. PMID: 24617909.
  16. Larsen B, Benitez T, Cano M, Dunsiger SS, Marcus BH, Mendoza-Vasconez A, et al.

- Web-Based Physical Activity Intervention for Latina Adolescents: Feasibility, Acceptability, and Potential Efficacy of the Niñas Saludables Study. *J Med Internet Res. Journal of Medical Internet Research*; 2018;20(5):e170. PMID: 29743151.
17. Short CE, Rebar A, James EL, Duncan MJ, Courneya KS, Plotnikoff RC, et al. How do different delivery schedules of tailored web-based physical activity advice for breast cancer survivors influence intervention use and efficacy? *J Cancer Surviv. Journal of Cancer Survivorship*; 2017;11(1):80–91. PMID: 27498099.
  18. Boudreau FF, Walthouwer MJL, De Vries H, Dagenais GR, Turbide G, Bourlaud A-SS, et al. Rationale, design and baseline characteristics of a randomized controlled trial of a web-based computer-tailored physical activity intervention for adults from Quebec City. *BMC Public Health. England: BMC Public Health*; 2015;15(1):1038. PMID: 26453041.
  19. Moreau M, Gagnon M-P, Boudreau FF. Development of a fully automated, web-based, tailored intervention promoting regular physical activity among insufficiently active adults with type 2 diabetes: integrating the I-change model, self-determination theory, and motivational interviewing compon. *JMIR Res Protoc. Canada*; 2015;4(1):e25. PMID: 25691346.
  20. Rajanna V, Behera DJ, Goldberg D, Hammond T. Step Up Life: A Context Aware Health Assistant. *HealthGIS'14*. 2014;21–30. DOI: 10.1145/2676629.2676636.
  21. Irvine AB, Gelatt VA, Seeley JR, Macfarlane P, Gau JM. Web-based intervention to promote physical activity by sedentary older adults: randomized controlled trial. *Ajzen Ajzen, Allison, Chodzko-Zajko, Armitage, Bandura, Bandura, Baranowski, Beauchamp, Blissmer, Bock, Booth, Bowen, Bowles, Calfas, Carlson, Christensen, Christensen, Cohen, Conn, Conn, Cress, Danaher, Davies, DiBrezzo, Doshi, Duncan, Eysenbach, Fillen A, editor. J Med Internet Res. Irvine, A. Blair: ORCAS, 260 E. 11th Avenue, Eugene, OR, US, 97401, birvine@orcasin.com: Gunther Eysenbach*; 2013;15(2):e19. PMID: 23470322.
  22. Friederichs SAHH, Oenema A, Bolman C, Lechner L. Motivational interviewing and self-determination theory in a web-based computer tailored physical activity intervention: A randomized controlled trial. *Psychol Heal. Routledge*; 2016;31(8):907–930. PMID: 26849996.
  23. Blake H, Suggs LS, Coman E, Aguirre L, Batt ME. Active8! Technology-Based Intervention to Promote Physical Activity in Hospital Employees. *Am J Heal Promot*. 2017;31(2):109–118. PMID: 26559712.
  24. Coolbaugh CL, Raymond SC, Hawkins DA, Raymond Jr SC, Hawkins DA. Feasibility of a dynamic web guidance approach for personalized physical activity prescription based on daily information from wearable technology. *JMIR Res Protoc*. 2015;4(2):e67. PMID: 26043793.
  25. Hargreaves EA, Mutrie N, Fleming JD. A Web-Based Intervention to Encourage Walking (StepWise): Pilot Randomized Controlled Trial. *JMIR Res Protoc. Canada*; 2016;5(1):e14. PMID: 26810251.
  26. Williams QI, Gunn AH, Beaulieu JE, Benas BC, Buley B, Callahan LF, et al. Physical

- therapy vs. internet-based exercise training (PATH-IN) for patients with knee osteoarthritis: study protocol of a randomized controlled trial. *BMC Musculoskeletal Disord*. *BMC Musculoskeletal Disorders*; 2015;16(1):264. PMID: 26416025.
27. Kwasnicka D, Vandelanotte C, Rebar A, Gardner B, Short C, Duncan M, et al. Comparing motivational, self-regulatory and habitual processes in a computer-tailored physical activity intervention in hospital employees - protocol for the PATHS randomised controlled trial. *BMC Public Health*. *BMC Public Health*; 2017;17(1):518. PMID: 28549476.
  28. Janols R, Guerrero E, Lindgren H. A pilot study on personalised coaching to increase older adults' physical and social activities [Internet]. *Adv Intell Syst Comput*. 2017. p. 140–148. DOI: 10.1007/978-3-319-61118-1\_18.
  29. Ali R, Afzal M, Hussain M, Ali M, Siddiqi MH, Lee S, et al. Multimodal hybrid reasoning methodology for personalized wellbeing services. *Comput Biol Med*. Elsevier; 2016;69:10–28. PMID: 26705863.
  30. Mistry CD, Sweet SN, Rhodes RE, Latimer-Cheung AE. Text2Plan: Exploring changes in the quantity and quality of action plans and physical activity in a text messaging intervention. *Psychol Health*. England: Routledge; 2015;30(7):839–56. PMID: 25659571.
  31. Peels DA, Hoogenveen RR, Feenstra TL, Golsteijn RH, Bolman C, Mudde AN, et al. Long-term health outcomes and cost-effectiveness of a computer-tailored physical activity intervention among people aged over fifty: modelling the results of a randomized controlled trial. *BMC Public Health*. England; 2014;14(1):1099. PMID: 25342517.
  32. Klein MCAA, Manzoor A, Mollee JS. Active2Gether: A personalized m-health intervention to encourage physical activity. *Sensors (Switzerland)*. 2017;17(6):1–16. PMID: 28629178.
  33. Ammann R, Vandelanotte C, de Vries H, Mummery WK. Can a Website-Delivered Computer-Tailored Physical Activity Intervention Be Acceptable, Usable, and Effective for Older People? *Health Educ Behav*. 2013;40(2):160–170. PMID: 23077157.
  34. Pyky R, Koivumaa-Honkanen H, Leinonen A-MM, Ahola R, Hirvonen N, Enwald H, et al. Effect of tailored, gamified, mobile physical activity intervention on life satisfaction and self-rated health in young adolescent men: A population-based, randomized controlled trial (MOPO study). *Comput Human Behav*. 2017;72:13–22. DOI: 10.1016/j.chb.2017.02.032.
  35. Varadharajan V, Kannav V, Pasala A, Kannav, Pasala. Sensor based coaching for a fit and healthy society. *Int Symp Technol Soc Proc. IEEE*; 2016;2016–Decem(October):81–85. DOI: 10.1109/ISTAS.2016.7764275.
  36. Codreanu IA, Florea AM. A Proposed Serious Game Architecture to Self-Management HealthCare for Older Adults. *Proc - 17th Int Symp Symb Numer Algorithms Sci Comput SYNASC 2015. IEEE*; 2016;437–440. DOI: 10.1109/SYNASC.2015.71.
  37. Marsaux CFMM, Celis-Morales C, Livingstone KM, Fallaize R, Kolossa S, Hallmann J, et al. Changes in physical activity following a genetic-based internet-delivered

- personalized intervention: Randomized controlled trial (Food4Me). *J Med Internet Res. Canada*; 2016;18(2):1–16. PMID: 26851191.
38. Alley S, Jennings C, Plotnikoff RC, Vandelanotte C. Web-based video-coaching to assist an automated computer-tailored physical activity intervention for inactive adults: A randomized controlled trial. *J Med Internet Res.* 2016;18(8):1–16. PMID: 27520283.
  39. Mitchell BL, Smith AE, Rowlands A V., Fraysse F, Parfitt G, Lewis NR, et al. Promoting physical activity in rural Australian adults using an online intervention. *J Sci Med Sport. Sports Medicine Australia*; 2018; PMID: 30031747.
  40. Oosterom-Calo R, Te Velde SJ, Stut W, Brug J. Development of Motivate4Change Using the Intervention Mapping Protocol: An Interactive Technology Physical Activity and Medication Adherence Promotion Program for Hospitalized Heart Failure Patients. *JMIR Res Protoc.* 2015;4(3):e88. PMID: 26195072.
  41. De Cocker K, De Bourdeaudhuij I, Cardon G, Vandelanotte C. The Effectiveness of a Web-Based Computer-Tailored Intervention on Workplace Sitting: A Randomized Controlled Trial. *J Med Internet Res.* 2016;18(5):e96. PMID: 27245789.
  42. Triantafyllidis A, Filos D, Buys R, Claes J, Cornelissen V, Kouidi E, et al. Computerized decision support for beneficial home-based exercise rehabilitation in patients with cardiovascular disease. *Comput Methods Programs Biomed.* 2018;162(May):1–10. PMID: 29903475.
  43. Dobrican RA, Zampunieris D. A Proactive Solution, using Wearable and Mobile Applications, for Closing the Gap between the Rehabilitation Team and Cardiac Patients. *Proc - 2016 IEEE Int Conf Healthc Informatics, ICHI 2016.* IEEE; 2016. p. 146–155. DOI: 10.1109/ICHI.2016.23.
  44. Hales S, Turner-McGrievy G, Fahim A, Freix A, Wilcox S, Davis RE, et al. A Mixed-Methods Approach to the Development, Refinement, and Pilot Testing of Social Networks for Improving Healthy Behaviors. *JMIR Hum Factors.* 2016;3(1):e8. PMID: 27026535.
  45. Martin CK, Gilmore LA, Apolzan JW, Myers CA, Thomas DM, Redman LM. Smartloss: A Personalized Mobile Health Intervention for Weight Management and Health Promotion. *JMIR mHealth uHealth.* Canada; 2016;4(1):e18. PMID: 26983937.
  46. Spark LC, Fjeldsoe BS, Eakin EG, Reeves MM. Efficacy of a Text Message-Delivered Extended Contact Intervention on Maintenance of Weight Loss, Physical Activity, and Dietary Behavior Change. *JMIR mHealth uHealth.* 2015;3(3):e88. PMID: 26373696.
  47. Kattelman KK, White AA, Greene GW, Byrd-Bredbenner C, Hoerr SL, Horacek TM, et al. Development of Young Adults Eating and Active for Health (YEAH) internet-based intervention via a community-based participatory research model. *J Nutr Educ Behav.* Elsevier Inc.; 2014;46(2):S10-25. PMID: 24456834.
  48. Partridge SR, McGeechan K, Hebden L, Balestracci K, Wong AT, Denney-Wilson E, et al. Effectiveness of a mHealth Lifestyle Program With Telephone Support (TXT2BFiT) to Prevent Unhealthy Weight Gain in Young Adults: Randomized Controlled Trial. *JMIR mHealth uHealth.* Canada; 2015;3(2):e66. PMID: 26076688.

49. Walthouwer MJL, Oenema A, Soetens K, Lechner L, De Vries H. Systematic development of a text-driven and a video-driven web-based computer-tailored obesity prevention intervention. *BMC Public Health*. England; 2013;13(1):978. PMID: 24138937.
